**Genetic analysis of SARS-CoV-2 isolates collected from Bangladesh: insights into the origin, mutation spectrum, and possible pathomechanism**

Md Sorwer Alam Parvez<sup>1</sup>, Mohammad Mahfujur Rahman<sup>1</sup>, Md Niaz Morshed<sup>1</sup>, Dolilur Rahman<sup>1</sup>, Saeed Anwar<sup>2</sup>, Mohammad Jakir Hosen<sup>1,\*</sup>

<sup>1</sup>Department of Genetic Engineering & Biotechnology, Shahjalal University of Science & Technology, Sylhet 3114, Bangladesh

<sup>2</sup>Department of Medical Genetics, Faculty of Medicine and Dentistry, University of Alberta, 8440 112 St. NW, Edmonton, AB T6G 2R7, Canada

\*Corresponding author: E-mail: [jakir-gen@sust.edu](mailto:jakir-gen@sust.edu)

## **Abstract**

As the coronavirus disease 2019 (COVID-19), caused by the severe acute respiratory syndrome coronavirus-2 (SARS-CoV-2), rages across the world, killing hundreds of thousands and infecting millions, researchers are racing against time to elucidate the viral genome. Some Bangladeshi institutes are also in this race, sequenced a few isolates of the virus collected from Bangladesh. Here, we present a genomic analysis of 14 isolates. The analysis revealed that SARS-CoV-2 isolates sequenced from Dhaka and Chittagong were the lineage of Europe and the Middle East, respectively. Our analysis identified a total of 42 mutations, including three large deletions, half of which were synonymous. Most of the missense mutations in Bangladeshi isolates found to have weak effects on the pathogenesis. Some mutations may lead the virus to be less pathogenic than the other countries. Molecular docking analysis to evaluate the effect of the mutations on the interaction between the viral spike proteins and the human ACE2 receptor, though no significant interaction was observed. This study provides some preliminary insights into the origin of Bangladeshi SARS-CoV-2 isolates, mutation spectrum and its possible pathomechanism, which may give an essential clue for designing therapeutics and management of COVID-19 in Bangladesh.

**Keywords:** COVID-19; SARS-CoV-2; Bangladeshi isolates; genome; spike protein; mutation; ACE2 receptor.

## 1 Introduction

2 The coronavirus disease 2019 (COVID-19) is an infectious disease caused by severe acute respiratory  
3 syndrome coronavirus 2 (SARS-CoV-2). Common symptoms of the disease include fever, cough, fatigue,  
4 shortness of breath, nausea, vomiting, and diarrhea. The disease has emerged as a critical, rapidly  
5 evolving global health crisis [1-3]. More than 6.5 million people have contracted the virus, and nearly 400  
6 thousand have died [4, 5]. In Bangladesh, the COVID-19 was first reported on 7 March by the Institute of  
7 Epidemiology Disease Control and Research (IEDCR) [6]. Until the end of March, the infection rate was  
8 sort of low; however, as the non-therapeutic prevention measures enforced by the government faced  
9 enormous challenges, the infection rate raised drastically in April and kept on rising [7]. The people did  
10 not maintain the social distancing enforced by the government and trend to gather in crowded places [8].  
11 Moreover, an inadequacy of testing for COVID-19 diagnosis is a common criticism in Bangladesh [9]. As  
12 of 5 June 2020, nearly 65 thousand confirmed cases were reported, with a total of 846 deaths in  
13 Bangladesh [10].

14 SARS-CoV-2 is a positive-stranded RNA virus with a genome of ~ 30kb, encodes structural and non-  
15 structural proteins. Like other RNA viruses, the SARS-CoV-2 is prone to frequent mutations, which makes  
16 it challenging to develop therapeutics and vaccines against the virus [11, 12]. Sequence information of  
17 both the pathogen and the host would greatly facilitate an effective therapeutic strategy or vaccine  
18 development [13]. Analysis of the genome sequences obtained from a vast array of isolates collected  
19 from different regions could provide an idea about the efficacy of the vaccines being developed [14].  
20 Henceforth, researchers across the world are running against time to unravel the genomic insights into  
21 the virus.

22 Till 2 June 2020, some thirty-five thousand genome sequences of SARS-CoV-2 has been submitted from  
23 different countries, where most of the sequence have come from European countries (~20000). About  
24 7000 complete genome sequences have been submitted from the USA while China has submitted ~850  
25 genome sequences. In Bangladesh, 16 isolates of the virus have been sequenced and deposited in  
26 GSAID (Global Initiative on Sharing Avian Influenza Data) database till 20<sup>th</sup> May 2020. Unfortunately,  
27 there is yet a study on the genomics of the SARS-CoV-2 in Bangladeshi isolates.

28 This study aimed to provide some preliminary insights into the genetic structure of all isolates reported in  
29 Bangladesh along with the mutational spectrum. It presents the first study on SARS-CoV-2 genomes  
30 obtained from Bangladesh, which, in broader terms, would help the therapeutic strategy development and  
31 vaccination programs against the virus in the country.

32

33

## 34 **Materials and Methods**

### 35 **Retrieval of the SARS-CoV-2 Genome Sequences**

36 Till 20<sup>th</sup> May, genome sequence of 16 Bangladeshi SARS-CoV-2 isolates were found deposited in the  
37 GSAID, however genome sequence of 2 isolates were found incomplete. Thus, all 14 complete genome  
38 sequences of the reported isolates of SARS-CoV-2 in Bangladesh were retrieved from the GISAID  
39 database (<https://www.gisaid.org/>). As many of the Bangladeshi people return during the COVID-19  
40 outbreak mainly from China, India, Saudi Arabia, Spain, Italy, Japan, Qatar, Canada, Kuwait, USA,  
41 France, Sweden, and Switzerland, the first deposited genome sequence of those countries were also  
42 retrieved. Sequence information of the first isolate collected from China was considered as a reference for  
43 further analysis.

### 44 **Identification of Nucleotide Variations in Bangladeshi Strain**

45 We performed multiple sequence alignment using Clustal Omega [15, 16], and the sequence of the strain  
46 China [EPI\_ISL\_402124 ] was used as a reference genome. The alignment file was analyzed using  
47 MVIEW program of Clustal Omega [17]. Only variations in the coding regions were analyzed in this study.

### 48 **Prediction of Viral Genome and Identification of Selected Genes**

49 FGENESV of SoftBerry (<http://linux1.softberry.com/berry.phtml>), which is a Trained Pattern/Markov  
50 chain-based viral gene prediction tools, was adopted for the prediction of the genes as well as the  
51 proteins from the viral genomes. Each predicted protein (for each viral genomes) was identified using the  
52 Basic Local Alignment Search Tool (BLAST), at the interface of the National Center for Biotechnology  
53 Information (NCBI). The identity of each protein was evaluated compared to the proteins of the reference  
54 strain [18].

### 55 **Detection of Mutation Spectrum**

56 Again, Clustal Omega was used for the multiple sequence alignment of each protein, which further  
57 analyzed by MVIEW. The amino acid variations were identified in each protein comparing to the protein of  
58 the reference strain. Further, both nucleotide variations and amino acid variations were compared to  
59 study the types of mutations.

### 60 **Prediction of Mutational Effects**

61 The structural and functional effects of the missense variants, along with the stability change, were  
62 analyzed using different prediction tools. I-mutant was employed to analyze the stability change where all

63 the parameters were kept in default [19]. Additionally, Mutpred2 was adopted to predict the molecular  
64 consequences and functional effect of these mutations [20].

### 65 **Homology Modeling of Spike Proteins and Validation**

66 The BLASTp program at the NCBI interface (link) was used to find the most suitable template for  
67 homology modeling. Blasting against the protein databank reservoir (PDB) identified spike protein  
68 (Human) with PDB ID: 6VSB as a suitable template, as it has 99.59% sequence similarity and 94%  
69 coverage with the target sequence. The homology modeling of all mutant spike proteins along with the  
70 spike protein of the reference was done using SWISS-MODEL [21]. The validation of the predicted model  
71 was done by adopting Rampage and ERRAT [22, 23].

### 72 **Molecular Docking of Spike Protein with ACE2 Receptor**

73 The molecular docking approach was employed to investigate the interaction of mutant spike protein with  
74 the human ACE2 receptor. First, the crystal structure of human ACE2 (PDB ID 6D0G) was obtained from  
75 Protein Data Bank, and PyMOL was used to clean the structure to remove all the complex molecules and  
76 water [24, 25]. The HDOCK webserver was used for prediction of the interaction between Spike protein  
77 and human ACE2 receptor through the protein-protein molecular docking [26]. PyMOL was also used for  
78 the visualization of docking interactions.

## 79 **Results**

### 80 **Retrieved Genome Sequence of the SARS-CoV-2**

81 A total number of 14 complete genome sequences of the SARS-CoV-2 isolates from Bangladesh and 12  
82 genome sequence from the isolates of other countries (China, India, Saudi Arabia, Spain, Italy, Japan,  
83 Qatar, Canada, Kuwait, USA, France, Sweden, and Switzerland) have been retrieved from GSAID. The  
84 strain of Wuhan accession number with EPI\_ISL\_402124 was considered as the reference strain.

### 85 **Phylogenetic Tree Analysis**

86 Phylogenetic tree analysis revealed that all the selected Bangladeshi isolates could be divided into two  
87 main groups, where one group shared a common ancestor with Saudi Arabia (Fig 1). The other group  
88 found to have a similarity with the strain from Switzerland, and it could be subdivided into two groups. In  
89 one subdivision, four isolates clustered with the strain from Spain, while the other group consisted only of  
90 the three Bangladeshi isolates. All the Bangladeshi isolates centered and shared a common ancestor with  
91 India and the USA.

92

### 93 **Predictions of the Genes and Proteins**

94 FGENESV predicted the presence of 12 genes in the reference. Interestingly, all except five isolates  
95 (EPI\_ISL\_445213, EPI\_ISL\_445214, EPI\_ISL\_450342, EPI\_ISL\_450343, and EPI\_ISL\_450344) of  
96 Bangladesh also showed a similar result. Both isolates EPI\_ISL\_445213 and EPI\_ISL\_445217 found to  
97 have ten genes (missing of ORF7a and ORF10 genes) and isolate EPI\_ISL\_450343 and  
98 EPI\_ISL\_450344 have 11 genes (missing ORF8 gene). Multiple sequence alignment revealed that most  
99 of the variation in Bangladeshi isolates occurred in the ORF1a polyprotein, surface glycoproteins, and  
100 nucleocapsid phosphoprotein. Remarkably, envelope glycoprotein, ORF6, ORF8, and ORF10 were found  
101 100% identical in most of the isolates compared to the reference sequence (Table 1).

### 102 **Mutation Spectrum of Bangladeshi SARS-CoV-2 isolates**

103 Analysis of all 14 Bangladeshi isolates revealed a total of 42 single nucleotide variants (Fig 2); 24 of them  
104 were nonsynonymous missense in character. Besides, three large deletions were also found in those  
105 isolates (Table 2). Among the deletions, two deletions were responsible for the deletion of ORF7a in  
106 EPI\_ISL\_445213 and EPI\_ISL\_445217 isolates. Another large deletion from nucleotide 27911 to 28254,  
107 occurred in EPI\_ISL\_450343 and EPI\_ISL\_450344 isolates, responsible for the deletion of ORF8 in both  
108 isolates. Surprisingly, three consecutive mutations were found at nucleotide position 28882 to 28884;  
109 resulted in two amino acids substitution in nucleocapsid phosphoprotein.

### 110 **Mutational Effects**

111 Mutational effects analysis of the 24 missense mutations found that 18 mutations were responsible for  
112 decreasing structural stability. Mutations located in the ORF1a polyprotein and surface glycoprotein were  
113 predicted to decrease the structural stability of both proteins (Table 3). Additionally, three mutations  
114 occurring in surface glycoprotein, ORF3a and ORF6 were predicted to alter the molecular consequences,  
115 including loss of sulfation in surface glycoprotein and loss of proteolytic cleavage in ORF3a and loss of  
116 allosteric site in ORF6 (Table 4 and Supplementary Table 1).

### 117 **Prediction and Validation of the Homology Models**

118 In total, three models were generated using the template PDB ID: 6VSB; one model for the spike protein  
119 of reference strain, and the two others were for two different mutant isolates from Bangladesh (Fig 3).  
120 Two types of mutations were found in the spike proteins of all Bangladeshi isolates, where most of the  
121 isolates were found to contain a substitution of D623G. Only one strain, EPI\_ISL\_445214, found to have  
122 two substitutions; one was similar to the previous substitution, and the other was F1118L. The validation  
123 assessment scores of these three models were mostly similar to the template, which provided the  
124 reliability of these models (Table 5).

## 125 **Analysis of the Interaction Between Spike Proteins and Human ACE2 Receptor**

126 HDOCK server was used to predict the interaction between the above-mentioned 3D models of reference  
127 spike proteins along with mutant models and the human ACE2 receptor. Interestingly, this molecular  
128 docking analysis revealed that the docking score for the three models against the human ACE2 receptor  
129 was similar, and it was -244.42; mutation in the spike proteins do not hamper binding with ACE2 receptor.  
130 For three spike protein models, this study found that a domain of spike protein instead of whole protein,  
131 amino acid ranging from 345 to 527, was involved in the interactions. This domain was conserved in all  
132 isolates resulting in similar interactions with ACE2 (Fig 4).

## 133 **Discussion**

134 COVID-19 has become a global challenge for the scientific communities affecting millions of people and  
135 taking thousands of lives every day. Scientists worldwide are working hard to combat against SARS-CoV-  
136 2, but no significant outcome is obtained [27, 28]. Along with other studies, genetic studies can give a  
137 significant clue to understanding the pathogenesis of COVID-19. Together with the critical therapeutic  
138 target, the genomic sequence data may provide insights into the pattern of global spread, the diversity  
139 during the epidemics, and the dynamics of evolutions, which are crucial to unwind the molecular  
140 mechanism of COVID-19 [29]. This study gives insights into the transmission of SARS-CoV-2, genetic  
141 diversity of the isolates, and predicts the impacts of mutations in Bangladesh.

142 It has been reported that, during the COVID-19 outbreak about 600000 people had entered into  
143 Bangladesh from the other countries including Italy and Spain [30]. The phylogenetic study revealed that  
144 the Bangladeshi isolates found in Dhaka were descendent from Europe, and most of the isolates from  
145 Chittagong are descendent from the Middle East. However, two isolates of Chittagong were close to the  
146 isolates from Dhaka. Dhaka is the capital city of Bangladesh and the sixth most densely populated city in  
147 the world. This virus may spread to other regions of the country from this city as it is the central hub of  
148 Bangladesh for financial, political, entertainment, and education. The SARS-CoV-2 isolates collected from  
149 Chittagong are close to the isolates from the Middle East is not surprising. As most of the migrants from  
150 Bangladesh live in Middle East are from Chittagong, and during the COVID-19 outbreak thousands of  
151 them returned to their home city [31, 32].

152 Mutation in the viral genome is a ubiquitous phenomenon for the viruses to escape the host defense. But  
153 the mutation rate in SARS-CoV-2 much lower than the other RNA viruses, including seasonal flu viruses  
154 [33]. In this study, there was found some variations in the SARS-CoV-2 isolated in Bangladesh, which  
155 may affect the epidemiology and pathogenicity of the virus. A total of 42 mutations were identified with a  
156 large deletion in the coding regions, where about half were synonymous. Even some isolates found not to  
157 encode one or more accessory proteins such as ORF7a, ORF8, and ORF10 caused by a large deletion in

158 the genome. Absent of these accessory proteins may have adverse effects on the viral replication or  
159 pathogenesis and the expression of structural protein E [34].

160 Moreover, ORF8 is involved in the crucial adaptation pathways of coronavirus from human-to-human. At  
161 the same time, ORF7a contributes to the viral pathogenesis in the host by inhibiting Bone marrow stromal  
162 antigen 2 (BST-2), which restricts the release of coronaviruses from affected cells. Loss of ORF7a causes  
163 a much more significant restriction of the virus's spreading into the host [35, 36]. Loss of these accessory  
164 proteins may lead to the virus being less pathogenic, resulting in a meager infection rate and mortality  
165 compared to the other countries [34].

166 Additionally, many variations in structural and non-structural proteins caused substitutions of one or more  
167 amino acids were found in the isolates of Bangladesh compared to the reference. Most of the mutations  
168 found to affect the structural stability of the proteins rather than alter the molecular functions. Among the  
169 structural proteins, most variations were found in Surface glycoproteins (spike) and Nucleocapsid  
170 phosphoprotein. Spike proteins play a crucial role in the viral entry into the cell by interacting with the  
171 human ACE2 receptor. At the same time, Nucleocapsid phosphoprotein is essential for the packaging of  
172 viral genomes into a helical ribonucleocapsid (RNP) and fundamental for viral self-assembly [37, 38].  
173 These functions may not affect much by those mutations, as Mutpred2 predicted that these mutations did  
174 not alter any molecular consequences of the proteins.

175 Moreover, molecular docking analysis revealed that mutations in spike proteins do not affect the  
176 interaction with the ACE2 receptor; give us a notion that mutation in the spike protein maybe for the better  
177 adaption of the SARS-CoV-2. Thus, therapeutics targeted against the spike protein of SARS-CoV-2 may  
178 not give the expected result. This study also identified a domain in the spike protein (amino acid ranging  
179 from 345 to 527) involved with human ACE2 receptor interaction rather than the whole protein. This  
180 domain was conserved in all isolates reported in Bangladesh, resulting in no effect of the mutations. A  
181 recent study identified the receptor-binding domain of spike protein, amino acid ranging from 319 to 541,  
182 to interact with the ACE2 receptor, which is similar to our findings [39].

## 183 **Conclusion**

184 SARS-CoV-2 isolates from Dhaka and Chittagong were close to European and Mideast lineage. A large  
185 deletion in the EPI\_ISL\_445213, EPI\_ISL\_445214, EPI\_ISL\_450343, and EPI\_ISL\_450344 isolates may  
186 explain the less pathogenic result of COVID-19 compared to other countries. Mutations in the spike  
187 protein of SARS-CoV-2 may induce more adaptation of this fetal virus; can cause less effective  
188 therapeutics if targeted. Our study gives novel insights to understand the SARS-CoV-2 epidemiology in  
189 Bangladesh.

190



191 **Conflict of interest**

192 The authors declare that they have no competing interests.

193 **Ethical approval**

194 Not required.

195 **Funding**

196 SUST Research Center funds MH. SA is supported by the (1) Alberta Innovates Graduate Student  
197 Scholarship (AIGSS), and the (2) Maternal and Child Health (MatCH) Scholarship programs.

198 **Data availability**

199 All data supporting the findings of this study are available within the article and its supplementary  
200 materials.

201 **Author Contribution**

202 MH conceived the study. MP and SA designed the study and analyzed the data. MP, MR, MM, and DR  
203 performed the experiments. MP wrote the first draft of the manuscript. MH, MP, and SA contributed to the  
204 final version of the manuscript. All authors approved the final manuscript.

205 **References**

- 206 1. Zheng, Y. Y., Ma, Y. T., Zhang, J. Y., & Xie, X. (2020). COVID-19 and the cardiovascular  
207 system. *Nature Reviews Cardiology*, 17(5), 259-260.
- 208 2. Yin, W., Mao, C., Luan, X., Shen, D. D., Shen, Q., Su, H., ... & Chang, S. (2020). Structural basis  
209 for inhibition of the RNA-dependent RNA polymerase from SARS-CoV-2 by remdesivir. *Science*.
- 210 3. Tang, D., Comish, P., & Kang, R. (2020). The hallmarks of COVID-19 disease. *Plos Pathogens*,  
211 16(5), e1008536.
- 212 4. "WHO Director-General's opening remarks at the media briefing on COVID-19". World Health  
213 Organization (WHO) (Press release). 11 March 2020
- 214 5. COVID-19 Dashboard by the Center for Systems Science and Engineering (CSSE) at Johns  
215 Hopkins University (JHU)". *ArcGIS*. Johns Hopkins University. Retrieved 1 June 2020.
- 216 6. "Bangladesh confirms its first three cases of coronavirus". Reuters. 8 March 2020. Archived from  
217 the original on 27 March 2020. Retrieved 27 March 2020
- 218 7. Dhaka Tribune. *20-fold Rises in COVID-19 Cases in Bangladesh Since April 1*. (2020). Available  
219 at: [https://www.dhakatribune.com/health/coronavirus/2020/04/14/20-fold-rise-of-covid-19-cases-](https://www.dhakatribune.com/health/coronavirus/2020/04/14/20-fold-rise-of-covid-19-cases-in-bangladesh-since-april-1)  
220 [in-bangladesh-since-april-1](https://www.dhakatribune.com/health/coronavirus/2020/04/14/20-fold-rise-of-covid-19-cases-in-bangladesh-since-april-1)

- 221 8. The Business Standard. *So Much Social Distancing*. (2020). Available online at:  
222 [https://tbsnews.net/coronavirus-chronicle/coronavirus-bangladesh/so-much-social-distancing-](https://tbsnews.net/coronavirus-chronicle/coronavirus-bangladesh/so-much-social-distancing-60973)  
223 [60973](https://tbsnews.net/coronavirus-chronicle/coronavirus-bangladesh/so-much-social-distancing-60973)
- 224 9. Dhaka Tribune. *Bangladesh Expands Covid-19 Testing*. (2020). Available online at:  
225 <https://www.dhakatribune.com/bangladesh/2020/04/03/bangladesh-expands-covid-19-testing>
- 226 10. Institute of Epidemiology, Disease Control and Research (IEDCR). Available at:  
227 [www.corona.gov.bd](http://www.corona.gov.bd). Retrieved 3 May 2020.
- 228 11. Wang, H., Li, X., Li, T., Zhang, S., Wang, L., Wu, X., & Liu, J. (2020). The genetic sequence,  
229 origin, and diagnosis of SARS-CoV-2. *European Journal of Clinical Microbiology & Infectious*  
230 *Diseases*, 1.
- 231 12. Ruan, Y., Wei, C. L., Ling, A. E., Vega, V. B., Thoreau, H., Thoe, S. Y. S., ... & Zhang, T. (2003).  
232 Comparative full-length genome sequence analysis of 14 SARS coronavirus isolates and  
233 common mutations associated with putative origins of infection. *The Lancet*, 361(9371), 1779-  
234 1785.
- 235 13. Seib, K. L., Dougan, G., & Rappuoli, R. (2009). The key role of genomics in modern vaccine and  
236 drug design for emerging infectious diseases. *PLoS genetics*, 5(10).
- 237 14. Amanat, F., & Krammer, F. (2020). SARS-CoV-2 vaccines: status report. *Immunity*.
- 238 15. Madeira, F., Park, Y. M., Lee, J., Buso, N., Gur, T., Madhusoodanan, N., ... & Lopez, R. (2019).  
239 The EMBL-EBI search and sequence analysis tools APIs in 2019. *Nucleic acids research*,  
240 47(W1), W636-W641.
- 241 16. Sievers, F., & Higgins, D. G. (2014). Clustal omega. *Current protocols in bioinformatics*, 48(1), 3-  
242 13.
- 243 17. Brown, N. P., Leroy, C., & Sander, C. (1998). MView: a web-compatible database search or  
244 multiple alignment viewer. *Bioinformatics (Oxford, England)*, 14(4), 380-381.
- 245 18. Madden, T. (2013). The BLAST sequence analysis tool. In *The NCBI Handbook [Internet]. 2nd*  
246 *edition*. National Center for Biotechnology Information (US).
- 247 19. Capriotti, E., Fariselli, P., & Casadio, R. (2005). I-Mutant2. 0: predicting stability changes upon  
248 mutation from the protein sequence or structure. *Nucleic acids research*, 33(suppl\_2), W306-  
249 W310.
- 250 20. Pejaver, V., Urresti, J., Lugo-Martinez, J., Pagel, K. A., Lin, G. N., Nam, H. J., ... & Mooney, S. D.  
251 (2017). MutPred2: inferring the molecular and phenotypic impact of amino acid variants. *BioRxiv*,  
252 134981.
- 253 21. Schwede, T., Kopp, J., Guex, N., & Peitsch, M. C. (2003). SWISS-MODEL: an automated protein  
254 homology-modeling server. *Nucleic acids research*, 31(13), 3381-3385.
- 255 22. Lovell, S. C. (2002). AWadBP, et all. *Structure validation by C  $\alpha$  geometry: phi, psi and C  $\beta$ -*  
256 *deviation*. *J of Proteins*, 50, 437-450.

- 257 23. Colovos, C., & Yeates, T. O. (1993). ERRAT: an empirical atom-based method for validating  
258 protein structures. *Protein Sci*, 2(9), 1511-1519.
- 259 24. Berman, H. M., Westbrook, J., Feng, Z., Gilliland, G., Bhat, T. N., Weissig, H., ... & Bourne, P. E.  
260 (2000). The protein data bank. *Nucleic acids research*, 28(1), 235-242.
- 261 25. DeLano, W. L. (2002). Pymol: An open-source molecular graphics tool. *CCP4 Newsletter on*  
262 *protein crystallography*, 40(1), 82-92.
- 263 26. Yan, Y., Zhang, D., Zhou, P., Li, B., & Huang, S. Y. (2017). HDock: a web server for protein–  
264 protein and protein–DNA/RNA docking based on a hybrid strategy. *Nucleic acids research*,  
265 45(W1), W365-W373.
- 266 27. Lake, M. A. (2020). What we know so far: COVID-19 current clinical knowledge and research.  
267 *Clinical Medicine*, 20(2), 124.
- 268 28. Yuen, K. S., Ye, Z. W., Fung, S. Y., Chan, C. P., & Jin, D. Y. (2020). SARS-CoV-2 and COVID-  
269 19: The most important research questions. *Cell & bioscience*, 10(1), 1-5.
- 270 29. Khailany, R. A., Safdar, M., & Ozaslan, M. (2020). Genomic characterization of a novel SARS-  
271 CoV-2. *Gene reports*, 100682.
- 272 30. World Socialist Web Site. *Bangladesh Government Downplays COVID-19 Threat as Jobless*  
273 *Mount*. (2020). Available at: <https://www.wsws.org/en/articles/2020/03/16/bang-m16.html>
- 274 31. The Financial Express. *Manpower Export from Chittagong Regions Rises in 2017*. (2018)  
275 Available at: [https://thefinancialexpress.com.bd/economy/bangladesh/manpower-export-from-](https://thefinancialexpress.com.bd/economy/bangladesh/manpower-export-from-chittagong-region-rises-in-2017-1515563258)  
276 [chittagong-region-rises-in-2017-1515563258](https://thefinancialexpress.com.bd/economy/bangladesh/manpower-export-from-chittagong-region-rises-in-2017-1515563258)
- 277 32. Middle East Eye. *Coronavirus: Bangladesh imposes 14-day Quarantine on Gulf Workers*. (2020).  
278 Available at: [https://www.middleeasteye.net/news/coronavirus-bangladesh-quarantine-workers-](https://www.middleeasteye.net/news/coronavirus-bangladesh-quarantine-workers-gulf-kuwait-saudi-arabia-qatar)  
279 [gulf-kuwait-saudi-arabia-qatar](https://www.middleeasteye.net/news/coronavirus-bangladesh-quarantine-workers-gulf-kuwait-saudi-arabia-qatar)
- 280 33. Oberemok, V. V., Laikova, K. V., Yurchenko, K. A., Fomochkina, I. I., & Kubyshekin, A. V. (2020).  
281 SARS-CoV-2 will continue to circulate in the human population: an opinion from the point of view  
282 of the virus-host relationship. *Inflammation Research*, 1-6.
- 283 34. Keng, C. T., Choi, Y. W., Welkers, M. R., Chan, D. Z., Shen, S., Lim, S. G., ... & Tan, Y. J. (2006).  
284 The human severe acute respiratory syndrome coronavirus (SARS-CoV) 8b protein is distinct  
285 from its counterpart in animal SARS-CoV and down-regulates the expression of the envelope  
286 protein in infected cells. *Virology*, 354(1), 132-142.
- 287 35. Decaro, N., & Lorusso, A. (2020). Novel human coronavirus (SARS-CoV-2): A lesson from animal  
288 coronaviruses. *Veterinary Microbiology*, 108693.
- 289 36. Taylor, J. K., Coleman, C. M., Postel, S., Sisk, J. M., Bernbaum, J. G., Venkataraman, T., ... &  
290 Frieman, M. B. (2015). Severe acute respiratory syndrome coronavirus ORF7a inhibits bone  
291 marrow stromal antigen 2 virion tethering through a novel mechanism of glycosylation  
292 interference. *Journal of virology*, 89(23), 11820-11833.

- 293 37. Chang, C. K., Hou, M. H., Chang, C. F., Hsiao, C. D., & Huang, T. H. (2014). The SARS  
294 coronavirus nucleocapsid protein—forms and functions. *Antiviral research*, *103*, 39-50.
- 295 38. Hoffmann, M., Kleine-Weber, H., Schroeder, S., Krüger, N., Herrler, T., Erichsen, S., ... & Müller,  
296 M. A. (2020). SARS-CoV-2 cell entry depends on ACE2 and TMPRSS2 and is blocked by a  
297 clinically proven protease inhibitor. *Cell*.
- 298 39. Lan, J., Ge, J., Yu, J., Shan, S., Zhou, H., Fan, S., ... & Wang, X. (2020). Structure of the SARS-  
299 CoV-2 spike receptor-binding domain bound to the ACE2 receptor. *Nature*, 1-6.

## Tables

**Table 1:** Predicted number of genes and identity compared to the reference strain. (Legends: S1: EPI\_ISL\_437912; S2: EPI\_ISL\_445213; S3: EPI\_ISL\_445214; S4: EPI\_ISL\_445215; S5: EPI\_ISL\_445216; S6: EPI\_ISL\_445217; S7: EPI\_ISL\_445244; S8: EPI\_ISL\_450339; S9: EPI\_ISL\_450340; S10: EPI\_ISL\_4503441; S11: EPI\_ISL\_450342; S12: EPI\_ISL\_450343; S13: EPI\_ISL\_450344; S14: EPI\_ISL\_450345; M: Missing)

**Table 2:** All mutations found in the coding regions of the 14 isolates compared to the reference strain. (Legends: S1: EPI\_ISL\_437912; S2: EPI\_ISL\_445213; S3: EPI\_ISL\_445214; S4: EPI\_ISL\_445215; S5: EPI\_ISL\_445216; S6: EPI\_ISL\_445217; S7: EPI\_ISL\_445244; S8: EPI\_ISL\_450339; S9: EPI\_ISL\_450340; S10: EPI\_ISL\_4503441; S11: EPI\_ISL\_450342; S12: EPI\_ISL\_450343; S13: EPI\_ISL\_450344; S14: EPI\_ISL\_450345)

**Table 3:** Prediction of the mutational effects on the structural stability.

**Table 4:** Prediction of the effects of the mutation on the molecular consequences.

**Table 5:** Model Validation assessment score

## Figures

**Fig 1:** Phylogenetic tree of the 14 Bangladeshi isolates of the virus along with other 12 countries

Fig 2: Variations Plot of SARS-CoV-2 in Bangladeshi isolates

**Fig 3:** Homology model of the spike proteins; (A) China (B) Model with one mutation: D623G (C) Model with two mutations: D623G and F1118L (D) Superimpose of all model. Here, B and C, red dot represent the mutation site. In D, purple color represents China; the cyan represents a model with one mutation, and the green represents a model with two mutations.

**Fig 4:** Interaction of Spike protein with ACE2: (A) carton model and (B) Surface model. Here, green represents the binding domain of spike protein, and cyan represents human ACE2.

## Supplementary Files

**Supplementary Table 1:** Mutpred score for all mutations. Scores of < 0.5 indicate no effect on molecular consequences.

**Table 1:** Predicted number of genes and identity compared to the reference strain. (Legends: S1: EPI\_ISL\_437912; S2: EPI\_ISL\_445213; S3: EPI\_ISL\_445214; S4: EPI\_ISL\_445215; S5: EPI\_ISL\_445216; S6: EPI\_ISL\_445217; S7: EPI\_ISL\_445244; S8: EPI\_ISL\_450339; S9: EPI\_ISL\_450340; S10: EPI\_ISL\_4503441; S11: EPI\_ISL\_450342; S12: EPI\_ISL\_450343; S13: EPI\_ISL\_450344; S14: EPI\_ISL\_450345; M: Missing)

| No | Protein                      | S1    | S2    | S3    | S4    | S5    | S6    | S7    | S8    | S9    | S11   | S11   | S12   | S13   | S14   |
|----|------------------------------|-------|-------|-------|-------|-------|-------|-------|-------|-------|-------|-------|-------|-------|-------|
| 1  | ORF1a Polyprotein            | 99.98 | 99.93 | 99.95 | 99.95 | 100   | 99.95 | 100   | 99.95 | 99.98 | 99.98 | 99.95 | 99.98 | 99.98 | 99.98 |
| 2  | ORF1b Polyprotein            | 99.96 | 100   | 100   | 100   | 100   | 100   | 100   | 100   | 100   | 100   | 99.96 | 100   | 100   | 100   |
| 3  | Surface Glycoprotein         | 99.92 | 100   | 99.84 | 99.92 | 99.92 | 99.92 | 99.92 | 100   | 100   | 100   | 100   | 99.92 | 99.92 | 100   |
| 4  | ORF3a protein                | 100   | 99.64 | 100   | 99.64 | 100   | 99.64 | 100   | 100   | 100   | 100   | 100   | 99.27 | 99.64 | 99.64 |
| 5  | envelope protein             | 100   | 100   | 100   | 100   | 100   | 100   | 100   | 100   | 100   | 100   | 100   | 100   | 100   | 100   |
| 6  | Membrane Glycoprotein        | 100   | 100   | 100   | 100   | 100   | 100   | 100   | 100   | 100   | 100   | 100   | 100   | 100   | 100   |
| 7  | ORF6 protein                 | 100   | 100   | 100   | 100   | 100   | 100   | 100   | 100   | 100   | 100   | 100   | 99.36 | 100   | 100   |
| 8  | ORF7a protein                | 100   | M     | 100   | 100   | 100   | M     | 100   | 100   | 100   | 100   | 100   | 100   | 100   | 100   |
| 9  | ORF7b                        | 100   | 100   | 100   | 100   | 100   | 100   | 100   | 100   | 100   | 100   | 100   | 100   | 100   | 100   |
| 10 | ORF8                         | 100   | 100   | 100   | 100   | 100   | 100   | 100   | 99.17 | 100   | 99.17 | 99.17 | M     | M     | 99.35 |
| 11 | Neucleocapsid phosphoprotein | 99.52 | 99.76 | 99.28 | 99.28 | 100   | 99.28 | 100   | 99.76 | 99.52 | 99.52 | 99.76 | 99.76 | 99.76 | 99.76 |
| 12 | ORF10                        | 100   | M     | 100   | 100   | 100   | M     | 100   | 100   | 100   | 100   | M     | 100   | 100   | 100   |



**Table 2:** All mutations found in the coding regions of the 14 isolates compared to the reference strain. (Legends: S1: EPI\_ISL\_437912; S2: EPI\_ISL\_445213; S3: EPI\_ISL\_445214; S4: EPI\_ISL\_445215; S5: EPI\_ISL\_445216; S6: EPI\_ISL\_445217; S7: EPI\_ISL\_445244; S8: EPI\_ISL\_450339; S9: EPI\_ISL\_450340; S10: EPI\_ISL\_4503441; S11: EPI\_ISL\_450342; S12: EPI\_ISL\_450343; S13: EPI\_ISL\_450344; S14: EPI\_ISL\_450345)

| Strain                       | Mutation        | Protein               | Amino Acid Changes     | Mutation Types |
|------------------------------|-----------------|-----------------------|------------------------|----------------|
| S11, 14                      | 283:C>T         | ORF1a Polyprotein     | No change              | Synonymous     |
| S9, 10                       | 602:C>T         | ORF1a Polyprotein     | No Change              | Synonymous     |
| S1,2,3, 4,6                  | 1164:A>T        | ORF1a Polyprotein     | I300F                  | Missense       |
| S1,2,3, 4, 5, 6, 7, 12, 13   | 3038:C>T        | ORF1a Polyprotein     | No Change              | Synonymous     |
| S5                           | 3689:C>T        | ORF1a Polyprotein     | No Change              | Synonymous     |
| S2,3, 4, 6                   | 4445:G>T        | ORF1a Polyprotein     | No Change              | Synonymous     |
| S8                           | 6730:A>G        | ORF1a Polyprotein     | N2155S                 | Missense       |
| S2, 3, 4, 6                  | 8372:G>T        | ORF1a Polyprotein     | Q2702H                 | Missense       |
| S8, 9, 10, 11, 14            | 8783:C>T        | ORF1a Polyprotein     | No change              | Synonymous     |
| S8, 9, 10, 11                | 10330:A>G       | ORF1a Polyprotein     | D3355G                 | Missense       |
| S14                          | 10871:G>T       | ORF1a Polyprotein     | K3353R                 | Missense       |
| S2                           | 10980:G>A       | ORF1a Polyprotein     | V3572M                 | Missense       |
| S11                          | 12120:C>T       | ORF1a Polyprotein     | P3952S                 | Missense       |
| S8                           | 12485:C>T       | ORF1a Polyprotein     | No Change              | Synonymous     |
| S1, 2, 3, 4, 5, 6, 7, 12, 13 | 14409:C>T       | ORF1ab Polyprotein    | P214L                  | Missense       |
| S5, 8, 9, 10, 11, 14         | 15325:C>T       | ORF1ab Polyprotein    | No Change              | Synonymous     |
| S8                           | 15739:C>T       | ORF1ab Polyprotein    | No change              | Synonymous     |
| S4                           | 15896:C>T       | ORF1ab Polyprotein    | No Change              | Synonymous     |
| S1                           | 17020:G>T       | ORF1ab Polyprotein    | E1084D                 | Missense       |
| S12, 13                      | 18878:C>T       | ORF1ab Polyprotein    | No Change              | Synonymous     |
| S11                          | 19405:G>A       | ORF1ab Polyprotein    | V1883T                 | Missense       |
| S12, 13                      | 22445:C>T       | Surface Glycoprotein  | No change              | Synonymous     |
| S14                          | 23321:C>T       | Surface Glycoprotein  | No change              | Synonymous     |
| S8, 9, 10, 11, 14            | 22469:G>T       | Surface Glycoprotein  | No change              | Synonymous     |
| S1,2, 3, 4, 5, 6, 7, 12, 13  | 23404:A>G       | Surface Glycoprotein  | D623G                  | Missense       |
| S3                           | 24488:T>C       | Surface Glycoprotein  | F1118L                 | Missense       |
| S12, 13                      | 25495:G>T       | ORF3a protein         | No change              | Synonymous     |
| S14                          | 25506:A>T       | ORF3a protein         | Q38L                   | Missense       |
| S12                          | 25512:C>T       | ORF3a protein         | S40L                   | Missense       |
| S12, 13                      | 25564:G>T       | ORF3a protein         | Q57H                   | Missense       |
| S2, 4, 6                     | 25907:G>T       | ORF3a protein         | G172C                  | Missense       |
| S12, 13                      | 26736:C>T       | Membrane Glycoprotein | No Change              | Synonymous     |
| S12                          | 27282:G>T       | ORF6 protein          | W27L                   | Missense       |
| S2                           | 27432-27651:DEL | ORF7a protein         | Whole protein deletion | Deletion       |
| S6                           | 27486-27613:DEL | ORF7a protein         | Whole protein deletion | Deletion       |
| S12, 13                      | 27911-28254:DEL | ORF8                  | Whole protein deletion | Deletion       |
| S14                          | 28098:C>T       | ORF8                  | A65V                   | Missense       |
| S8, 9, 10, 11, 14            | 28145:T>C       | ORF8                  | L84S                   | Missense       |
| S8, 9, 10, 11, 14            | 28879:G>A       | Nucleocapsid          | S202N                  | Missense       |

|                   |           |                                |           |            |
|-------------------|-----------|--------------------------------|-----------|------------|
|                   |           | phospoprotein                  |           |            |
| S1,2,3, 4, 6      | 28882:G>A | Neucleocapsid<br>phospoprotein | R203K     | Missense   |
| S1,2,3, 4, 6      | 28883:G>A | Neucleocapsid<br>phospoprotein | R203K     | Missense   |
| S1,2,3, 4, 6      | 28884:G>C | Neucleocapsid<br>phospoprotein | G204R     | Missense   |
| S9, 10            | 29293:G>T | Neucleocapsid<br>phospoprotein | K373N     | Missense   |
| S2,3, 4, 6        | 29404:A>G | Neucleocapsid<br>phospoprotein | D377G     | Missense   |
| S8, 9, 10, 11, 14 | 29643:G>A | ORF10                          | No Change | Synonymous |

**Table 3:** Prediction of the mutational effects on the structural stability.

| Protein                      | Amino Acid Changes | SVM2 Prediction Effect | DDG Value (kcal/mol) |
|------------------------------|--------------------|------------------------|----------------------|
| ORF1a Polyprotein            | I300F              | Decrease               | -1.79                |
| ORF1a Polyprotein            | N2155S             | Decrease               | -0.60                |
| ORF1a Polyprotein            | Q2702H             | Decrease               | -0.68                |
| ORF1a Polyprotein            | D3355G             | Decrease               | -0.95                |
| ORF1a Polyprotein            | K3353R             | Increase               | -0.13                |
| ORF1a Polyprotein            | V3572M             | Decrease               | -0.88                |
| ORF1a Polyprotein            | P3952S             | Decrease               | -1.21                |
| ORF1b Polyprotein            | P214L              | Decrease               | -0.83                |
| ORF1b Polyprotein            | E1084D             | Decrease               | -0.75                |
| ORF1b Polyprotein            | V1883T             | Decrease               | -1.46                |
| Surface Glycoprotein         | D623G              | Decrease               | -0.93                |
| Surface Glycoprotein         | F1118L             | Decrease               | -0.81                |
| ORF3a protein                | Q38L               | Increase               | 0.12                 |
| ORF3a protein                | S40L               | Increase               | 0.40                 |
| ORF3a protein                | Q57H               | Decrease               | -0.90                |
| ORF3a protein                | G172C              | Decrease               | -0.83                |
| ORF6 protein                 | W27L               | Decrease               | -0.96                |
| ORF8                         | A65V               | Increase               | 0.02                 |
| ORF8                         | L84S               | Decrease               | -2.29                |
| Neucleocapsid phosphoprotein | S202N              | Increase               | -0.78                |
| Neucleocapsid phosphoprotein | R203K              | Decrease               | -0.93                |
| Neucleocapsid phosphoprotein | G204R              | Decrease               | -0.52                |
| Neucleocapsid phosphoprotein | K373N              | Increase               | -0.10                |
| Neucleocapsid phosphoprotein | D377G              | Decrease               | -0.44                |

**Table 4:** Prediction of effects of the mutation on the molecular consequences.

| Protein Name                  | Mutation | Effects                                |
|-------------------------------|----------|----------------------------------------|
| Surface Glycoprotein          | F1118L   | Altered Ordered interface              |
|                               |          | Altered Disordered interface           |
|                               |          | Altered DNA binding                    |
|                               |          | Loss of Sulfation at Y1119             |
|                               |          | Altered Metal binding                  |
| ORF3a                         | G172C    | Loss of O-linked glycosylation at S171 |
|                               |          | Gain of Disulfide linkage at G172      |
|                               |          | Loss of Intrinsic disorder             |
|                               |          | Altered Transmembrane protein          |
|                               |          | Altered Ordered interface              |
|                               |          | Gain of Loop                           |
| ORF6                          | W27L     | Loss of Proteolytic cleavage at D173   |
|                               |          | Altered Ordered interface              |
|                               |          | Altered Disordered interface           |
|                               |          | Loss of Strand                         |
|                               |          | Gain of Helix                          |
|                               |          | Loss of Allosteric site at F22         |
|                               |          | Gain of Sulfation at Y31               |
|                               |          | Altered DNA binding                    |
| Altered Transmembrane protein |          |                                        |

**Table 5:** Model Validation assessment score

| Structures     | Rampage Score   |                | ERRAT Score |
|----------------|-----------------|----------------|-------------|
|                | Favoured Region | Allowed Region |             |
| Template       | 95.8%           | 4.1%           | 76%         |
| China (Ref)    | 92.9%           | 5.7%           | 83%         |
| Mutant Model 1 | 92.6%           | 5.3%           | 84.69%      |
| Mutant Model 2 | 92.8%           | 5.3%           | 83.78%      |

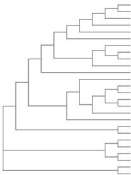

Bangladesh|FP|\_SI\_445213  
 Bangladesh|SI|\_SL\_416217  
 Bangladesh|FP|\_SI\_445215  
 Bangladesh|SI|\_SL\_416214  
 Bangladesh|FP|\_SI\_437942  
 Spain|SI|\_SL\_418261  
 Bangladesh|SI|\_SL\_416244  
 Bangladesh|FP|\_SI\_456043  
 Bangladesh|SI|\_SL\_456041  
 Bangladesh|FP|\_SI\_445216  
 Switzerland|SI|\_SL\_413395  
 Saudi  
 Bangladesh|SI|\_SL\_456039  
 Bangladesh|SI|\_SL\_456042  
 Bangladesh|FP|\_SI\_456040  
 Bangladesh|SI|\_SL\_456041  
 Bangladesh|FP|\_SI\_456045  
 Canada|SI|\_SL\_425477  
 India|FP|\_SI\_410523  
 USA|FP|\_SI\_404666  
 Kuwait|SI|\_SL\_410468  
 Italy|FP|\_SI\_410004  
 Sweden|SI|\_SL\_411654  
 France|FP|\_SI\_408559  
 China|SI|\_SL\_402124  
 Japan|FP|\_SI\_410532

No of Variant Isolates

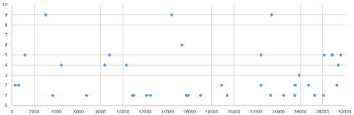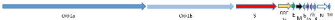

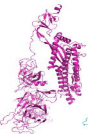

**A**

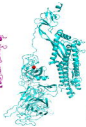

**B**

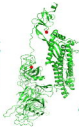

**C**

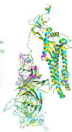

**D**



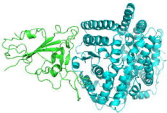

**A**

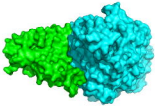

**B**
